# Supplementary material for: Effects of Omega-3 Long Chain Polyunsaturated Fatty Acid Supplementation on Cardiovascular Mortality: The Importance of the Dose of DHA
Source: MDPI journal article supplement (doi:10.3390/nu9121305), 2017-11-30
Supplement: s1 [file s1]

**Table S1.** Randomised Controlled Trials of n-3 LCPUFA and CVD mortality (includes CHD, Stroke, Heart failure, Sudden Cardiac death)

| Ref                                                  | n-3 Dose & placebo                                                                                | duration                                    | Study pop & no. & year of study                                                     | Anti-platelet                    | ACE Inhibitors                   | B-blockers                       | Chol drugs?                     | Diet?                                                  | Blood n-3s? | Outcome measures                                                                                                                                                                         | Comments                                                                                |
|------------------------------------------------------|---------------------------------------------------------------------------------------------------|---------------------------------------------|-------------------------------------------------------------------------------------|----------------------------------|----------------------------------|----------------------------------|---------------------------------|--------------------------------------------------------|-------------|------------------------------------------------------------------------------------------------------------------------------------------------------------------------------------------|-----------------------------------------------------------------------------------------|
| GISSI-P<br>Lancet<br>1999<br>[1]                     | 280mg EPA<br>560mg DHA per day.<br>Placebo - nothing                                              | 3.5 years                                   | 11,324<br>(=2,831 per group)<br>males with previous MI<br>Oct 93-Sept 95            | 92% B<br>88% 6<br>83% 42<br>mths | 47% B<br>41% 6<br>40% 42<br>mths | 44% B<br>41% 6<br>39% 42<br>mths | 5% B<br>29% 6<br>45% 42<br>mths | ≥ 1 fish<br>serve/wk =<br>73% B<br>=87% 6 & 42<br>mths | No          | <u>Primary</u><br>Death<br>(actual events 12.3% vs 14.6%)<br>Non-fatal MI<br>Stroke<br><u>Secondary analysis</u><br>All fatal events<br>CVD death<br>Cardiac<br>Coronary<br>Sudden death | Death 15% ↓<br>CVD death 20% ↓<br><br><br><br>↓ 20%<br>↓ 30%<br>↓ 35%<br>↓ 35%<br>↓ 40% |
| Svensson <i>et al.</i> 2006<br>OPACH<br>study<br>[2] | Omacor - 2<br>465mg EPA<br>375mg DHA<br>Therefore:<br>930mg EPA<br>750mg DHA<br>Placebo Olive Oil | 558 days<br>median follow-up<br>(1.5 years) | 206<br>(n=103 per group)<br><br>Chronic haemodialysis patients<br>Nov 2002-May 2003 | 70%                              | 25%                              | 53%                              | 20%                             | No                                                     | Yes         | <u>Primary:</u><br>All-cause mortality<br>Total CV events<br>(actual events 60% vs 57%)<br><u>Secondary:</u><br>MI (actual events 3.9% vs 12.6%)                                         | n.s.<br><br><br><br><br>↓ 70%<br>↓ 60%                                                  |

|                                   |                                                                 |         |                                                                                                      |       |     |       |     |    |    |                                                                                                                                                                                                                                                                            |                                                                                   |
|-----------------------------------|-----------------------------------------------------------------|---------|------------------------------------------------------------------------------------------------------|-------|-----|-------|-----|----|----|----------------------------------------------------------------------------------------------------------------------------------------------------------------------------------------------------------------------------------------------------------------------------|-----------------------------------------------------------------------------------|
|                                   |                                                                 |         |                                                                                                      |       |     |       |     |    |    | Major coronary events<br>(actual events 6.8% vs<br>16.5%)                                                                                                                                                                                                                  |                                                                                   |
| JELIS<br>Lancet 2007<br>[3]       | 1800mg EPA per<br>day & statin<br>Or statin alone<br>(=placebo) | 5 years | 18,645<br>(=9,323 per group)<br>(69% women)<br>Mean age 61 years<br>TC $\geq$ 6.5mmol/L<br>1996-1999 | 14% B | 25% | 19% B | 98% | No | No | <u>Primary</u><br>Any major coronary<br>event<br>(actual events 2.8% vs<br>3.5%)<br>Unstable angina<br>Non-fatal coronary<br>events                                                                                                                                        | 2.8% EPA<br>3.5% controls<br>= ↓ 19%<br><br>= ↓ 24%<br>= ↓ 19%<br>Secondary prevn |
| GISSI-HF<br>Lancet<br>2008<br>[4] | 280mg EPA<br>560mg DHA per<br>day.<br>Matching<br>placebo.      | 5 years | 6,975<br>(=3,488 per group)<br>(22% women)<br>6 Aug 2002-<br>28 Feb 2005                             | 10%   | 77% | 65%   | 23% | No | No | <u>Primary</u><br>Time to death<br>(actual events 27% vs<br>29%)<br>Admission to hospital<br><u>Secondary</u><br>CV mortality<br>admission for any<br>reason,<br>sudden cardiac death,<br>admission for cardio<br>vascular reasons,<br>admission for HF,<br>MI, and stroke | = ↓ 9%<br>= ↓ 8%<br><br>= ↓ 10%<br><br><br><br><br><br><br>= ↓ 7%                 |

|                                                                                |                                                                                                                                |              |                                                                                              |                 |                 |                 |                 |    |     |                                                                                                                                                               |                                                                                                                                                                                                                                                                                                                                                                                                                                                  |
|--------------------------------------------------------------------------------|--------------------------------------------------------------------------------------------------------------------------------|--------------|----------------------------------------------------------------------------------------------|-----------------|-----------------|-----------------|-----------------|----|-----|---------------------------------------------------------------------------------------------------------------------------------------------------------------|--------------------------------------------------------------------------------------------------------------------------------------------------------------------------------------------------------------------------------------------------------------------------------------------------------------------------------------------------------------------------------------------------------------------------------------------------|
| Einvik <i>et al.</i><br>Euro J<br>Cardiovasc<br>Prev<br>Rehabil<br>2010<br>[5] | 4 groups:<br>Placebo no diet<br>Placebo & diet<br>n-3 no diet<br>n-3 & diet<br><br>1176mg EPA<br>840mg DHA<br>Placebo corn oil | 3 years      | 563 men<br>(=approx. 140 per<br>group)<br>64-76 years<br>High cholesterol<br>>6.45mmol/l     | Not<br>reported | Not<br>reported | Not<br>reported | Not<br>reported | No | Yes | <u>Primary:</u><br>Carotid IMT<br>All-cause mortality<br>(actual event rate 5% vs<br>8.5%, p=0.06)<br>CV events<br>(actual event rate 11% vs<br>12.8%, p=0.6) | The DOIT was<br>designed and<br>powered to investigate<br>the effect of the<br>intervention strategies<br>on progression of<br>atherosclerosis and<br>thus, with insufficient<br>power to detect<br>changes in mortality.<br>Placebo group were<br>significantly younger!!<br>Atherosclerosis largest<br>risk factor is age!!!<br>The authors recognise<br>the small sample size!!<br>Also change in EPA<br>2.7fold<br>Change in DHA 1.4<br>fold |
| Kromhout<br>2010 Alpha<br>Omega<br>Trial<br>[6]                                | Margarine 18.8g<br>plus<br>1. 376mg EPA<br>and DHA 3:2<br>= 226mg EPA &<br>150mg DHA<br>2. 1.9g ALA                            | 40<br>months | 4,873 (=1,200 per<br>group)<br>Aged 60-80<br>78% men who had<br>MI<br>April 2002-Dec<br>2006 | 97%             | 90%             | 90%             | 86%             | No | Yes | <u>Primary:</u><br>Rate of CV event (actual<br>events 4.6% vs 4.57%)<br><br>MI<br>Cardiac arrest<br>Stroke<br>Cardiac interventions:                          | The power was only<br>35% due to the limited<br>number of cases that                                                                                                                                                                                                                                                                                                                                                                             |

|                                                    |                                                                                                                        |          |                                                                                                |     |     |     |     |                                                                                                        |     |                                                                                                                                                |                                                                                                                                                                                                                                                                                                                                                                                                |
|----------------------------------------------------|------------------------------------------------------------------------------------------------------------------------|----------|------------------------------------------------------------------------------------------------|-----|-----|-----|-----|--------------------------------------------------------------------------------------------------------|-----|------------------------------------------------------------------------------------------------------------------------------------------------|------------------------------------------------------------------------------------------------------------------------------------------------------------------------------------------------------------------------------------------------------------------------------------------------------------------------------------------------------------------------------------------------|
|                                                    | 3. 1.9g ALA<br>226mg EPA<br>150mg DHA 4.<br>Placebo                                                                    |          |                                                                                                |     |     |     |     |                                                                                                        |     | PCI<br>CABG<br>Debifr<br><br>Non fatal CV events                                                                                               | occurred in the Alpha<br>Omega Trial.<br><b>Because it is<br/>inadequately<br/>powered you cannot<br/>use it is a null finding</b>                                                                                                                                                                                                                                                             |
| Rauch<br>Circulation<br>2010<br>Omega trial<br>[7] | Purified omega-3<br>(460mg EPA<br>380mg DHA)<br>in addition to<br>current<br>guidelines for<br>MI<br>Placebo olive oil | 1 year   | 3,851<br>(=1,926 per group)<br>Aged 60<br>All had MI<br>25.6% female<br>Oct 2003-<br>June 2007 |     | 83% | 94% | 94% | Start:<br>No 4%<br>Occ 67%<br>Sev 28%<br>Daily .3%<br>End:<br>No 3%<br>Occ 51%<br>Sev 45%<br>Daily .8% | No  | <u>Primary:</u><br>Sudden cardiac death<br>(actual events 1.5% vs<br>1.5%)<br><u>Secondary:</u><br>Total mortality<br>Nonfatal clinical events | They did not reach<br>statistical power!!<br>The presented data<br>therefore do<br>not allow a final<br>answer on the<br>potential benefit of the<br>additional<br>application of highly<br>purified omega-3 fatty<br>acids for secondary<br>prevention after acute<br>myocardial infarction.<br><b>Because it is<br/>inadequately<br/>powered you cannot<br/>use it as a null<br/>finding</b> |
| Galan BMJ<br>2010<br>[8]                           | B vits & n-3s<br>(400mg EPA<br>200mg DHA)                                                                              | 4.7 year | 2,501<br>(=approx. 620 per<br>group)                                                           | 93% | 53% | 68% | 86% |                                                                                                        | Yes | <u>Primary:</u><br>CV event (actual event<br>rate 6.3%)                                                                                        | Not significant                                                                                                                                                                                                                                                                                                                                                                                |

|                                |                                                                                                        |           |                                                                                                                                          |     |                                 |      |     |                                                                                  |    |                                                                                                                                                                    |                                                                                                                                                       |
|--------------------------------|--------------------------------------------------------------------------------------------------------|-----------|------------------------------------------------------------------------------------------------------------------------------------------|-----|---------------------------------|------|-----|----------------------------------------------------------------------------------|----|--------------------------------------------------------------------------------------------------------------------------------------------------------------------|-------------------------------------------------------------------------------------------------------------------------------------------------------|
|                                | n-3s<br>(400mg EPA<br>200mg DHA)<br>B vits<br>Placebo                                                  |           | Men & women<br>aged 45-80 who<br>had acute<br>coronary or<br>ischaemic event in<br>past 12 mths<br>(MI or acute<br>coronary<br>syndrome) |     |                                 |      |     |                                                                                  |    | Bloods (% of tot FA)<br>EPA 1.15 to 2.1%<br>DHA 2.5 to 3.1%<br>EPA & DHA<br>3.7 to 5.2%                                                                            | ↑ 0.95% EPA<br>↑ 0.6% DHA<br>↑ 1.5% EPA & DHA                                                                                                         |
| Origin<br>LVEF<br>2011<br>[9]  | 465mg EPA<br>375mg DHA<br><br>3 groups:<br>4g n-3/day<br>1g n-3 & 3g<br>placebo/day<br>4g placebo/ day | 3 mths    | 43<br>(pilot study)<br>Severe non-<br>ischemic HF                                                                                        |     | 75-93%<br>ACE or<br>ARB<br>100% | 100% |     | No                                                                               | No | <u>Primary:</u><br>LVEF<br>FMD<br>IL-6<br>TNF-a<br>Exercise peak O2<br>consumption                                                                                 | Dose response<br>LVEF<br>FMD<br>IL-6<br>TNF-a going in right<br>direction but n.s.<br>Exercise n.s.<br>1g dose = 375mg DHA<br>4g dose = 1500mg<br>DHA |
| Origin<br>NEJM<br>2012<br>[10] | 465mg EPA<br>375mg DHA<br>Placebo olive oil                                                            | 6.2 years | 12,536<br>(approx. 6,300 per<br>group)<br>Patients with<br>dysglycemia                                                                   | 70% | 69%                             | 53%  | 54% | No, except<br>n-3<br>supplements<br>was<br>discouraged<br>FFQ B, 2 yr<br>and end | No | <u>Primary:</u><br>Death for CV causes<br>(actual event rate 9.1 vs<br>9.3%)<br><u>Secondary:</u><br>Death from arrhythmia<br>(actual event rates 0.78<br>vs 0.70) | Event rates are too low<br>to draw any                                                                                                                |

|                                                                     |                                                                  |                                                                                                |                                                      |     |     |     |     |    |     |                                                                                                               | meaningful conclusions                                                                                                                                                                                                                            |
|---------------------------------------------------------------------|------------------------------------------------------------------|------------------------------------------------------------------------------------------------|------------------------------------------------------|-----|-----|-----|-----|----|-----|---------------------------------------------------------------------------------------------------------------|---------------------------------------------------------------------------------------------------------------------------------------------------------------------------------------------------------------------------------------------------|
| OPERA trial<br>Wu <i>et al.</i><br>J Am Heart Assoc<br>2013<br>[11] | 465mg EPA<br>375mg DHA<br>(8-10g total)<br><br>Placebo olive oil | No. of<br>FO<br>loading<br>days<br>1=3<br>2=108<br>3=51<br>4=32<br>5=73<br>Plateau<br>4-5 days | 564<br>aged 63<br>72% male<br>Aug 2010-<br>June 2012 | 61% | 35% | 53% | 56% | No | Yes | <u>Primary:</u><br>PoAF                                                                                       | DHA is better for AF than EPA.<br><br>An $\uparrow$ in DHA from 3.15 to 3.84% is too low to see an effect on AF.                                                                                                                                  |
| Risk and Prevention Study<br>NEJM 2013<br>[12]                      | 465mg EPA<br>375mg DHA<br><br>Placebo olive oil                  | 5 years                                                                                        | 12,513<br>(=6,244 per group)                         | 41% | 45% | 20% | 41% | No | No  | Primary:<br>Rate of death<br>(actual event rate 11.7% vs 11.9%, p=0.64)<br><br>Nonfatal MI<br>Nonfatal stroke | However, after a blinded assessment at 1 year showed an event rate that was lower than expected, the primary efficacy end point was revised as the composite of time to death from cardiovascular causes or hospital admission for cardiovascular |

|  |  |  |  |  |  |  |  |  |  |  |                                                                                                                                                                                                                                                                                                                                                                                                                                                                        |
|--|--|--|--|--|--|--|--|--|--|--|------------------------------------------------------------------------------------------------------------------------------------------------------------------------------------------------------------------------------------------------------------------------------------------------------------------------------------------------------------------------------------------------------------------------------------------------------------------------|
|  |  |  |  |  |  |  |  |  |  |  | <p>causes.</p> <p>There were significantly fewer admissions for heart failure among patients who received n-3 fatty acids than among those who received placebo (96 patients [1.5%] vs. 142 patients [2.3%], P = 0.002) (Table S5 in the Supplementary Appendix).</p> <p>Women: a significantly lower rate of events among those who received n-3 fatty acids than among those who received placebo (hazard ratio, 0.82; 95% CI, 0.67 to 0.99; P = 0.04) (Fig. 2).</p> |
|--|--|--|--|--|--|--|--|--|--|--|------------------------------------------------------------------------------------------------------------------------------------------------------------------------------------------------------------------------------------------------------------------------------------------------------------------------------------------------------------------------------------------------------------------------------------------------------------------------|

|                |                                                                    |           |                                                                                                                                                                                |              |              |              |              |    |              |                                                                                                                                                                                                                                 |                                                                                                                                                                                                                        |
|----------------|--------------------------------------------------------------------|-----------|--------------------------------------------------------------------------------------------------------------------------------------------------------------------------------|--------------|--------------|--------------|--------------|----|--------------|---------------------------------------------------------------------------------------------------------------------------------------------------------------------------------------------------------------------------------|------------------------------------------------------------------------------------------------------------------------------------------------------------------------------------------------------------------------|
|                |                                                                    |           |                                                                                                                                                                                |              |              |              |              |    |              |                                                                                                                                                                                                                                 | No dietary intake assessments and no bloods. Possible overlap of study groups in terms of omega-3 status. No compliance check!                                                                                         |
| AREDS2<br>[13] | 650mg EPA<br>350mg DHA<br>10mg lutein<br>2mg zeaxanthin<br>placebo | 4.8 years | Cardiovascular Outcome Study was an ancillary study to the Age-Related Eye Disease Study 2 (AREDS2)<br>N=4,203<br>Aged 50-85 years<br>Intermediate or advanced ARMD in one eye | Not reported | Not reported | Not reported | Not reported | No | Not reported | Cardiovascular disease mortality (sudden death; death due to MI, heart failure, or stroke); CVD morbidity (MI; stroke; unstable angina; coronary and carotid revascularization; hospitalized CHF; resuscitated cardiac arrest). | Only 9% event rates in n-3 and placebo groups<br>Unadjusted HR (95% CI)<br>0.95 (0.78-1.17).<br>Authors admit that the study was powered to detect a change in macular degeneration and underpowered for CVD outcomes. |

1. GISSI Prevezione Investigators. Dietary supplementation with n-3 polyunsaturated fatty acids and vitamin e after myocardial infarction: Results of the gissi-prevenzione trial. *The Lancet* **1999**, *354*, 447-455.
2. Svensson, M.; Schmidt, E.B.; Jorgensen, K.A.; Christensen, J.H.; Group, O.S. N-3 fatty acids as secondary prevention against cardiovascular events in patients who undergo chronic hemodialysis: A randomized, placebo-controlled intervention trial. *Clin J Am Soc Nephrol* **2006**, *1*, 780-786.
3. Yokoyama, M.; Origasa, H.; Matsuzaki, M.; Matsuzawa, Y.; Saito, Y.; Ishikawa, Y.; Oikawa, S.; Sasaki, J.; Hishida, H.; Itakura, H., *et al.* Effects of eicosapentaenoic acid on major coronary events in hypercholesterolaemic patients (jelis): A randomised open-label, blinded endpoint analysis. *The Lancet* **2007**, *369*, 1090-1098.
4. GISSI-HF Investigators. Effect of n-3 polyunsaturated fatty acids in patients with chronic heart failure (the gissi-hf trial): A randomised, double-blind, placebo-controlled trial. *The Lancet* **2008**, *372*, 1223-1230.
5. Einvik, G.; Klemsdal, T.O.; Sandvik, L.; Hjerkin, E.M. A randomized clinical trial on n-3 polyunsaturated fatty acids supplementation and all-cause mortality in elderly men at high cardiovascular risk. *Eur J Cardiovasc Prev Rehabil* **2010**, *17*, 588-592.
6. Kromhout, D.; Giltay, E.J.; Geleijnse, J.M. N-3 fatty acids and cardiovascular events after myocardial infarction. *N Engl J Med* **2010**, *363*, 2015-2026.
7. Rauch, B.; Schiele, R.; Schneider, S.; Diller, F.; Victor, N.; Gohlke, H.; Gottwik, M.; Steinbeck, G.; Del Castillo, U.; Sack, R., *et al.* Omega, a randomized, placebo-controlled trial to test the effect of highly purified omega-3 fatty acids on top of modern guideline-adjusted therapy after myocardial infarction. *Circulation* **2010**, *122*, 2152-2159.
8. Galan, P.; Kesse-Guyot, E.; Czernichow, S.; Briancon, S.; Blacher, J.; Hercberg, S.; Group, S.F.O.C. Effects of b vitamins and omega 3 fatty acids on cardiovascular diseases: A randomised placebo controlled trial. *Br Med J* **2010**, *341*, c6273.
9. Moertl, D.; Hammer, A.; Steiner, S.; Hutuleac, R.; Vonbank, K.; Berger, R. Dose-dependent effects of omega-3-polyunsaturated fatty acids on systolic left ventricular function, endothelial function, and markers of inflammation in chronic heart failure of nonischemic origin: A double-blind, placebo-controlled, 3-arm study. *Am Heart J* **2011**, *161*, 915 e911-919.
10. The Origin Trial Investigators. N-3 fatty acids and cardiovascular outcomes in patients with dysglycemia. *N Engl J Med* **2012**, *367*, 309-318.
11. Wu, J.H.; Marchioli, R.; Silletta, M.G.; Macchia, A.; Song, X.; Siscovick, D.S.; Harris, W.S.; Masson, S.; Latini, R.; Albert, C., *et al.* Plasma phospholipid omega-3 fatty acids and incidence of postoperative atrial fibrillation in the opera trial. *J Am Heart Assoc* **2013**, *2*, e000397.
12. The Risk and Prevention Study Collaborative Group. N-3 fatty acids in patients with multiple cardiovascular risk factors. *N Engl J Med* **2013**, *368*, 1800-1808.
13. Writing Group for the AREDS2 Research Group. Effect of long-chain omega-3 fatty acids and lutein + zeaxanthin supplements on cardiovascular outcomes: Results of the age-related eye disease study 2 (areds2) randomized clinical trial. *JAMA Intern Med* **2014**, *174*, 763-771.
